# Supplementary material for: The effect of cycling hypoxia on MCF-7 cancer stem cells and the impact of their microenvironment on angiogenesis using human umbilical vein endothelial cells (HUVECs) as a model
Source: PeerJ journal article supplement (doi:10.7717/peerj.5990), 2019-01-08
Supplement: control.zip [file control.zip]

## Sheet: Sheet1
		WimTube Key Metrics						Tube Characteristics					Loop Characteristics						,
File Name		Covered Area [%]	Total Tube Length [px]	Total Branching Points	Total Loops	Total Nets		Total Tube Length [px]	Total Tubes	Mean Tube Length [px]	Standard Deviation Tube Length [px]		Total Loops	Mean Loop Area [px]	Standard Deviation Loop Area [px]	Mean Loop Perimeter [px]	Standard Deviation Loop Perimeter [px]		,
an_control_10hh		9,4	13873	54	14	9		13873	126	110	82		14	46972	83949	940	1052
