# Supplementary material for: The effect of cycling hypoxia on MCF-7 cancer stem cells and the impact of their microenvironment on angiogenesis using human umbilical vein endothelial cells (HUVECs) as a model
Source: PeerJ journal article supplement (doi:10.7717/peerj.5990), 2019-01-08
Supplement: INTR.20.zip [file INTR.20.zip]

## Sheet: Sheet1
		WimTube Key Metrics						Tube Characteristics					Loop Characteristics						,
File Name		Covered Area [%]	Total Tube Length [px]	Total Branching Points	Total Loops	Total Nets		Total Tube Length [px]	Total Tubes	Mean Tube Length [px]	Standard Deviation Tube Length [px]		Total Loops	Mean Loop Area [px]	Standard Deviation Loop Area [px]	Mean Loop Perimeter [px]	Standard Deviation Loop Perimeter [px]		,
an_con_10_4h_mix		23,6	33198	234	91	3		33198	424	78	48		91	12888	12003	518	345
